# Supplementary material
Source: PubMed Central journal article supplement (PMC1679711)
Supplement: JCI0629499sd.pdf [file JCI0629499sd.pdf]

# Supplementary

## Figure 1

**A**

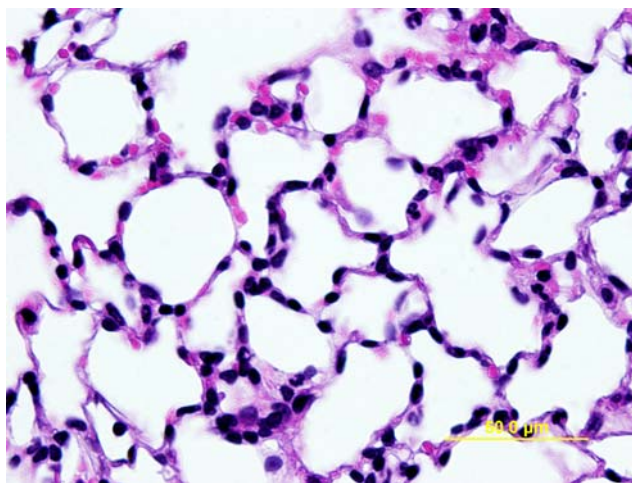

**B**

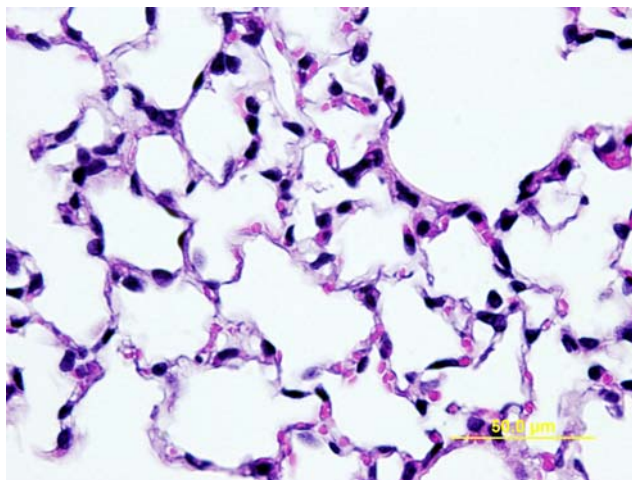

Supplementary Figure 1

**P-selectin or TP blockade prevent acid-induced ALI. (A-B)**

Photomicrographs were taken of lung tissue following H&E staining. The therapeutic administration of P-selectin antibody (A) or pre-treatment with a specific TP antagonist (B) protected from the development of ALI. In contrast to the lung in Figure 1E, the lungs in (A) and (B) showed a reduced influx of protein rich fluid and cells into the alveolar space, swelling of the interstitium, and cell accumulation in the interstitial space.

## Supplementary

Table 1

### Systemic leukocyte and platelet counts

|                                                   | Busulfan- treatment | Glycol (vehicle) |
|---------------------------------------------------|---------------------|------------------|
| Leukocytes<br>( $10^3/\mu\text{l}$ )              | $9.3 \pm 2.5$       | $11.1 \pm 3.1$   |
| Polymorphonuclear cells<br>( $10^3/\mu\text{l}$ ) | $2.0 \pm 0.7$       | $2.4 \pm 0.6$    |
| Mononuclear cells<br>( $10^3/\mu\text{l}$ )       | $7.3 \pm 2.3$       | $8.7 \pm 2.8$    |
| Platelets<br>( $10^5/\mu\text{l}$ )               | $3.7 \pm 2.0^*$     | $6.1 \pm 1.7$    |

n = 16-18 per group

\* P < 0.05
